# Supplementary material for: Rhizosphere Microenvironments of Eight Common Deciduous Fruit Trees Were Shaped by Microbes in Northern China
Source: Front Microbiol. 2018 Dec 18;9:3147. doi: 10.3389/fmicb.2018.03147 (PMC6305578; doi:10.3389/fmicb.2018.03147)
Supplement: Table S1 — Sequencing data details of bacterial communities. [file Table_1.xlsx]

## Sheet: Sheet1
Table S1 Sequencing data details of bacterial communities
	PFdata_stat								effective_stat
	Length	#Reads	Bases	Q20	Q30	GC	N		#PE_	#Nochimera	AvgLen	GC	Effective
	(bp)		(bp)	(%)	(%)	(%)	(ppm)		reads		(bp)	(%)	(%)
CK1	300	122148	36644400	91.56	81.75	57.33	0.19		61074	53505	455.93	56.97	87.61
CK2	300	172384	51715200	92.02	82.47	57.39	0.23		86192	76398	455.52	57.09	88.64
CK3	300	133466	40039800	91.84	82.11	57.34	0.25		66733	58796	455.62	57.06	88.11
Grape1	300	165460	49638000	91.94	82.36	56.37	0.12		82730	73072	455.27	56	88.33
Grape2	300	176888	53066400	92.18	82.8	56.57	0.21		88444	79015	455.6	56.22	89.34
Grape3	300	161452	48435600	92.07	82.59	56.3	0.17		80726	71427	454.99	55.94	88.48
Walnut1	300	144526	43357800	92.1	82.62	56.21	0.14		72263	64007	454.63	55.87	88.58
Walnut2	300	178230	53469000	92.11	82.66	56.37	0.28		89115	78743	455.11	56.04	88.36
Walnut3	300	150104	45031200	91.99	82.4	56.47	0.31		75052	66653	454.9	56.13	88.81
Pomegranate1	300	173776	52132800	92.24	82.86	55.73	0.48		86888	77056	454.51	55.39	88.68
Pomegranate2	300	157852	47355600	92.04	82.49	56.21	0.25		78926	69784	454.88	55.88	88.42
Pomegranate3	300	168758	50627400	92.15	82.68	55.93	0.24		84379	74304	454.69	55.62	88.06
Apricot1	300	143686	43105800	91.54	81.83	56.71	0.21		71843	63106	455.96	56.37	87.84
Apricot2	300	158648	47594400	91.51	81.72	56.51	0.15		79324	69676	455.21	56.13	87.84
Apricot3	300	127218	38165400	91.82	82.2	56.3	0.21		63609	56334	454.94	55.95	88.56
Cherry1	300	116842	35052600	91.65	81.83	56.85	0.23		58421	51556	455.84	56.5	88.25
Cherry2	300	135398	40619400	91.4	81.45	57.24	0.17		67699	59651	456.02	56.89	88.11
Cherry3	300	133908	40172400	91.65	81.97	56.91	0.15		66954	59192	456.47	56.59	88.41
Peach1	300	118236	35470800	91.58	81.73	57.2	0.2		59118	52093	456.04	56.83	88.12
Peach2	300	117104	35131200	91.64	81.88	57	0.09		58552	51719	456.21	56.63	88.33
Peach3	300	118750	35625000	91.65	81.92	57.34	0.17		59375	52243	455.79	56.97	87.99
Apple1	300	130666	39199800	91.61	81.9	56.46	0.28		65333	56749	455.94	56.12	86.86
Apple2	300	130922	39276600	91.53	81.7	56.3	0.28		65461	56649	455.65	55.99	86.54
Apple3	300	145564	43669200	91.48	81.68	56.07	0.11		72782	62910	455.53	55.72	86.44
Pear1	300	130498	39149400	91.62	81.9	56.78	0.13		65249	57292	456.08	56.45	87.81
Pear2	300	127820	38346000	91.49	81.63	56.8	0.05		63910	56001	456.28	56.44	87.62
Pear3	300	136814	41044200	91.65	81.92	56.44	0.22		68407	60285	455.86	56.09	88.13
