# Supplementary material for: Rhizosphere Microenvironments of Eight Common Deciduous Fruit Trees Were Shaped by Microbes in Northern China
Source: Front Microbiol. 2018 Dec 18;9:3147. doi: 10.3389/fmicb.2018.03147 (PMC6305578; doi:10.3389/fmicb.2018.03147)
Supplement: Table S2 — Sequencing data details of fungal communities. [file Table_2.xlsx]

## Sheet: Sheet1
Table S2 Sequencing data details of fungal communities
	PFdata_stat								effective_stat
	Length	#Reads	Bases	Q20	Q30	GC	N		#PE_	#Nochimera	AvgLen	GC	Effective
	(bp)		(bp)	(%)	(%)	(%)	(ppm)		reads		(bp)	(%)	(%)
CK1	300	134722	40416600	90.35	81.59	51.01	0.22		67361	62246	332.22	50.72	92.41
CK2	300	140004	42001200	89.9	81.34	53.11	0.24		70002	51888	324.65	51.97	74.12
CK3	300	114938	34481400	90.8	82.63	51.33	0.2		57469	53152	323.02	51.1	92.49
Grape1	300	115832	34749600	90.3	81.57	53.56	0.14		57916	54101	318.49	53.17	93.41
Grape2	300	129752	38925600	91.14	82.71	51.71	0.03		64876	60411	339.28	51.23	93.12
Grape3	300	121104	36331200	90.72	82.12	52.55	0.19		60552	56556	328.93	51.94	93.4
Walnut1	300	118848	35654400	91.22	82.95	51.49	0.34		59424	53662	330.05	50.78	90.3
Walnut2	300	114584	34375200	92.05	84.07	50.58	0.23		57292	53302	333.33	49.94	93.04
Walnut3	300	108548	32564400	90.38	81.79	50.81	0.83		54274	49244	333.11	50.13	90.73
Pomegranate1	300	111042	33312600	90.91	82.3	51.61	0.3		55521	51239	318.16	51.14	92.29
Pomegranate2	300	144934	43480200	89.69	80.58	51.57	0.78		72467	66035	319.4	51.09	91.12
Pomegranate3	300	105658	31697400	90.79	82.11	51.84	0.19		52829	49292	318.83	51.33	93.3
Apricot1	300	132532	39759600	90.44	81.83	50.84	0.18		66266	60783	331.53	50.58	91.73
Apricot2	300	120340	36102000	91.15	82.47	51.83	0.08		60170	56261	332.98	51.36	93.5
Apricot3	300	106384	31915200	91.19	82.64	49.11	0.19		53192	48965	340.68	48.83	92.05
Cherry1	300	95970	28791000	90.8	82.35	50.63	0.56		47985	45675	336.55	50.38	95.19
Cherry2	300	99664	29899200	90.17	81.41	53.29	0.23		49832	46656	332.57	52.71	93.63
Cherry3	300	108374	32512200	91.68	83.31	51.63	0.22		54187	51574	336.29	51.17	95.18
Peach1	300	102530	30759000	90.65	81.62	53.22	0.39		51265	47572	338.84	52.59	92.8
Peach2	300	124026	37207800	90.17	80.9	54.67	0.19		62013	57333	339.67	53.95	92.45
Peach3	300	116170	34851000	90.14	80.67	53.57	0.29		58085	53811	335.66	53.05	92.64
Apple1	300	102636	30790800	94.26	87.11	41.89	0.26		51318	49781	383.26	41.37	97
Apple2	300	133744	40123200	92.39	84.09	45.76	229.89		66872	59406	370.97	44.91	88.84
Apple3	300	130230	39069000	93	84.99	40.93	0.61		65115	62555	388.09	40.67	96.07
Pear1	300	152518	45755400	91.25	83.17	52.01	0.26		76259	71489	312.01	51.66	93.75
Pear2	300	122362	36708600	91.64	83.35	53.18	0.27		61181	57301	344.8	52.67	93.66
Pear3	300	115338	34601400	91.15	82.67	50.01	0.14		57669	53256	335.53	49.41	92.35
