# Supplementary material for: Rhizosphere Microenvironments of Eight Common Deciduous Fruit Trees Were Shaped by Microbes in Northern China
Source: Front Microbiol. 2018 Dec 18;9:3147. doi: 10.3389/fmicb.2018.03147 (PMC6305578; doi:10.3389/fmicb.2018.03147)
Supplement: Table S3 — Rhizosphere soil trace element content of different deciduous fruit trees. [file Table_3.xlsx]

## Sheet: Sheet1
	Table S3 Rhizosphere soil trace element content of different deciduous fruit trees
		Fe	Ca	Mg	Zn	B	Mn	Cu
		（mg/kg）	（g/kg）	（g/kg）	（mg/kg）	(mg/kg)	(mg/kg)	(mg/kg)
	CK	9.75±0.3e	3.76±0.04a	0.32±0.01a	1.43±0.08h	0.745±0.01f	11.88±0.2e	1.64±0.03e
	grape	11.96±0.12d	3.83±0.07a	0.33±0.01a	3.71±0.09d	0.959±0.016c	15±0.15bc	2.32±0.02d
	walnut	13.19±0.21c	3.77±0.02a	0.3±0b	7.86±0.18a	0.931±0.006cd	14.91±0.52bc	10.24±0.08a
	pomegranate	11.96±0.07d	3.58±0.03b	0.23±0d	4.71±0.07c	1.015±0.024b	15.7±0.08ab	4.35±0.11b
	apricot	10.36±0.4e	3.85±0.01a	0.23±0d	2.01±0.05g	0.875±0.013e	15.42±0.51ab	1.71±0.01e
	Cherry	10.3±0.24e	3.52±0.07b	0.23±0.01d	2.45±0.09f	0.94±0.002cd	13.67±0.32d	2.39±0.01d
	Peach	12.37±0.12d	3.77±0.06a	0.28±0c	2.09±0.09g	1.059±0.018a	13.94±0.16cd	1.78±0.02e
	apple	18.99±0.77a	3.86±0.03a	0.32±0a	6.56±0.04b	0.902±0.004de	14.71±0.17bcd	2.89±0.06c
	pear	16.73±0.06b	3.83±0.05a	0.27±0c	2.75±0.03e	0.921±0.013cd	16.47±0.64a	2.33±0.03d
