# Supplementary material for: Rhizosphere Microenvironments of Eight Common Deciduous Fruit Trees Were Shaped by Microbes in Northern China
Source: Front Microbiol. 2018 Dec 18;9:3147. doi: 10.3389/fmicb.2018.03147 (PMC6305578; doi:10.3389/fmicb.2018.03147)
Supplement: Table S4 — Pearson correlation coefficients between of soil enzymes and environmental factors. [file Table_4.xlsx]

## Sheet: Sheet1
Table S4 Pearson correlation coefficients between of soil enzymes and environmental factors.
	URE	CAE	GLU	CE	INE	ALP
K	0.024	-0.155	0.176	-0.107	0.238	0.266
P	0.448*	-0.269	-0.282	0.148	-0.291	0.301
NO3-N	0.205	-0.082	0.107	-0.062	0.241	0.387*
NH4-N	-0.066	0.023	0.221	-0.136	0.460*	0.312
SOM	0.567**	0.534**	0.371	0.234	0.465*	0.693**
pH	-0.152	-0.309	0.037	-0.262	-0.530**	-0.256
Fe	-0.11	-0.706**	-0.416*	-0.308	-0.185	0.2
Mn	0.309	0.089	0.168	0.019	0.494**	0.749**
Zn	0.341	0.024	-0.182	0.26	0.26	0.336
Cu	0.591**	0.346	0.035	0.460*	0.302	0.429*
Ca	-0.203	-0.455*	-0.093	0.005	-0.419*	-0.057
Mg	-0.172	-0.485*	-0.663**	0.348	-0.705**	-0.604**
B	-0.087	0.293	0.243	0.074	0.508**	0.219
PM	0.053	-0.085	-0.293	-0.091	0.257	0.365
CH	-0.099	0.202	0.209	-0.026	0.540**	0.304
PC	0.037	0.073	-0.057	-0.232	0.36	0.492**
CA	0.088	0.272	0.184	-0.152	0.648**	0.445*
AA	-0.033	0.073	-0.186	-0.043	0.420*	0.335
AN	-0.118	0.059	0.179	-0.271	0.483*	0.381
OM	0.318	0.446*	0.369	0.127	0.492**	0.507**
* Correlation is significant at the 0.05 level .
** Correlation is significant at the 0.01 level .
